# Supplementary material for: Formation of a long-lived cyclic isomer of ethylenedione
Source: Royal Society of Chemistry journal article supplement (doi:10.1039/c9cp01616c), 2019-01-01
Supplement: c9cp01616c1.pdf [file c9cp01616c1.pdf]

### Supplementary information

Table 1. Molecular structures of the possible products formed in the C + C<sub>2</sub>O<sub>2</sub> reaction. The transition state for the conversion between linear and cyclic structures is labeled by TS.

|                                                                                           | E (Hartree)<br>ccsd(t)/cc-pvQz | ZPE (Hartree)<br>b3lyp/6-311G+(d,p) | Optimized (ccsd(t)/cc-pvQz)<br>molecular geometries                                                                                                                      |
|-------------------------------------------------------------------------------------------|--------------------------------|-------------------------------------|--------------------------------------------------------------------------------------------------------------------------------------------------------------------------|
| 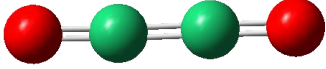         | -226.2839869                   | 0.013683                            | 0 3<br>C<br>C 1 B1<br>O 1 B2 2 A1<br>O 2 B3 1 A2 3 D1 0<br><br>B1 1.28630300<br>B2 1.18677081<br>B3 1.18695114<br>A1 179.713802<br>A2 179.763110<br>D1 163.1195927       |
|         | -226.2376725                   | 0.012735                            | 0 1<br>C<br>C 1 B1<br>O 1 B2 2 A1<br>O 2 B3 1 A2 3 D1 0<br><br>B1 1.43418966<br>B2 1.17691492<br>B3 1.34931699<br>A1 168.207507<br>A2 61.7790892<br>D1 164.327435        |
|        | -226.173412                    | 0.012045                            | 0 3<br>C<br>O 1 B1<br>O 1 B2 2 A1<br>C 3 B3 1 A2 2 D1 0<br><br>B1 1.16029800<br>B2 1.16526686<br>B3 2.57220476<br>A1 179.73084427<br>A2 114.06986082<br>D1 -176.27164717 |
| <br>TS | -226.2369514                   | 0.01184647                          | 0 1<br>C<br>O 1 B1<br>O 1 B2 2 A1<br>C 3 B3 1 A2 2 D1 0<br><br>B1 1.16211500<br>B2 1.57288571<br>B3 1.32715519<br>A1 129.8803825<br>A2 60.02247545<br>D1 -179.9916521    |
